# Supplementary material for: Structural Analysis and Dynamic Processes of the Transmembrane Segment Inside Different Micellar Environments—Implications for the TM4 Fragment of the Bilitranslocase Protein
Source: MDPI journal article supplement (doi:10.3390/ijms20174172), 2019-08-26
Supplement: s1 [file s1]

A dark blue outline of a house, with the roof forming a triangle above the text and the base forming a wide V-shape below it. The text "MDPI" is centered within the house shape.

**MDPI**
