# Supplementary figures and images for: Structural Analysis and Dynamic Processes of the Transmembrane Segment Inside Different Micellar Environments—Implications for the TM4 Fragment of the Bilitranslocase Protein
Source: MDPI journal article supplement (doi:10.3390/ijms20174172), 2019-08-26

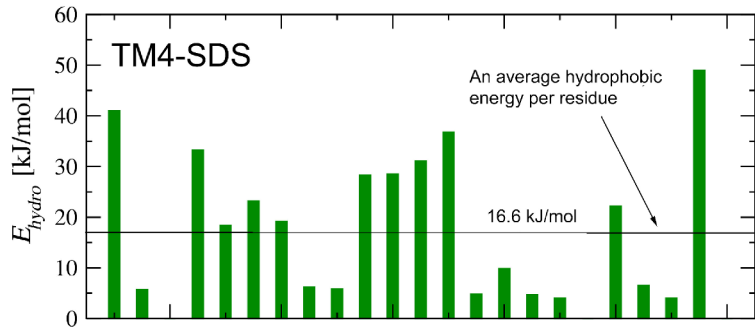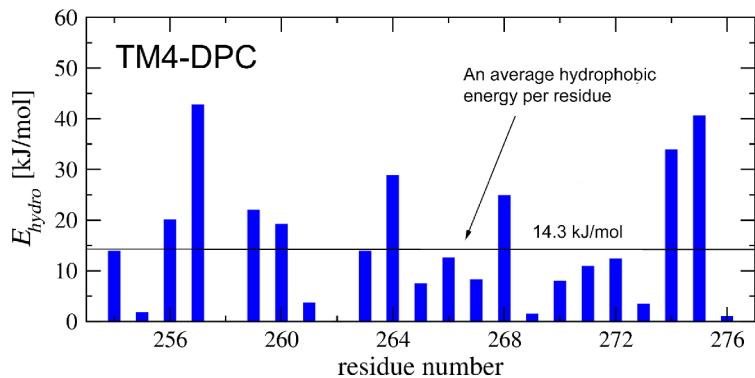

Supplement: s1 [file s1]

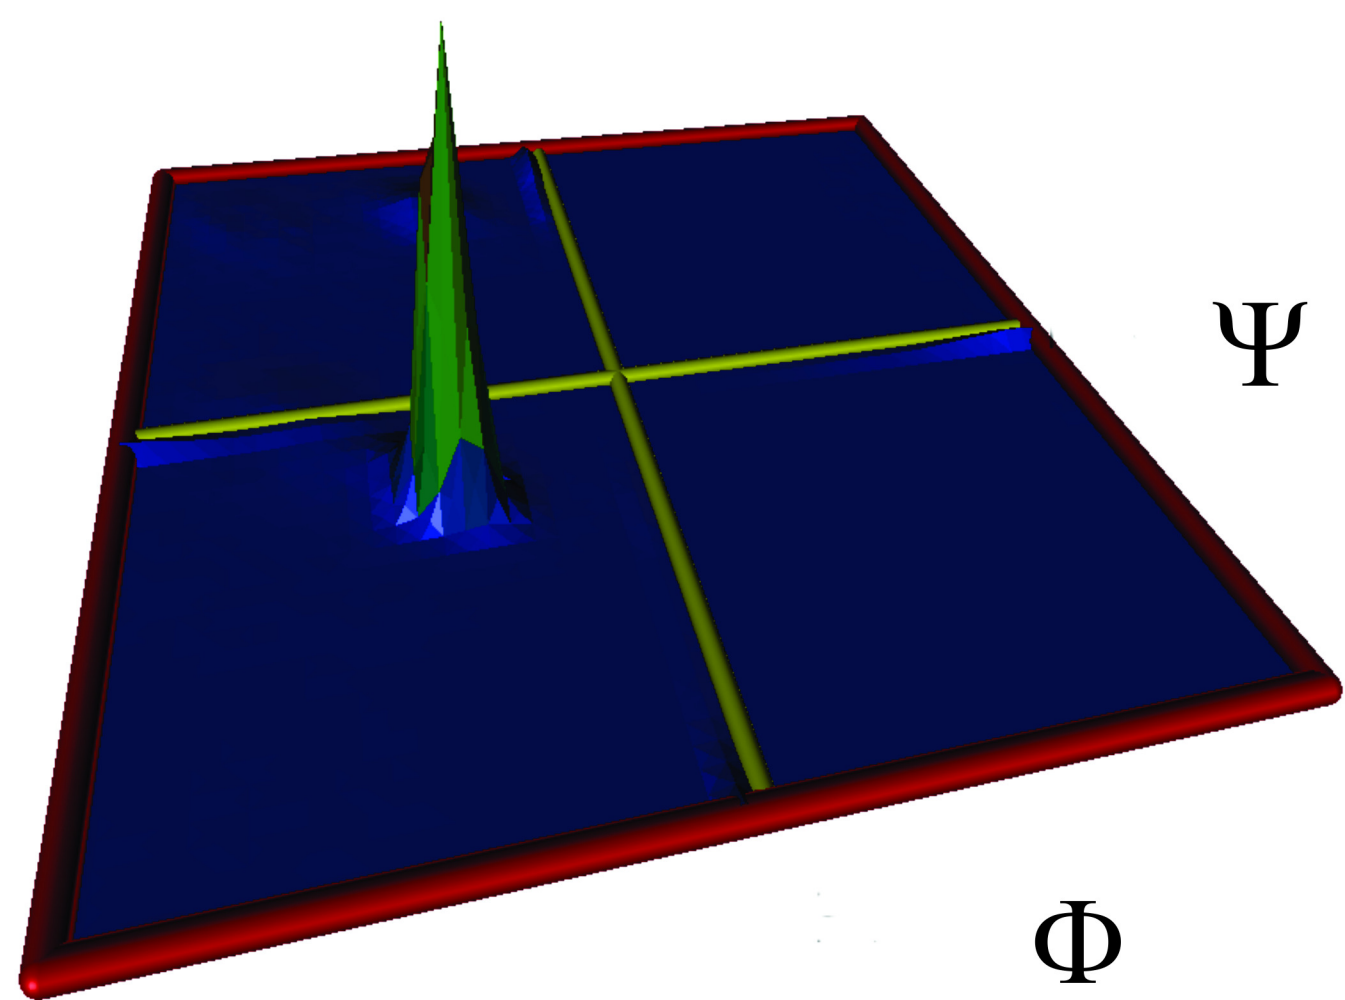

TM 4 HELIX

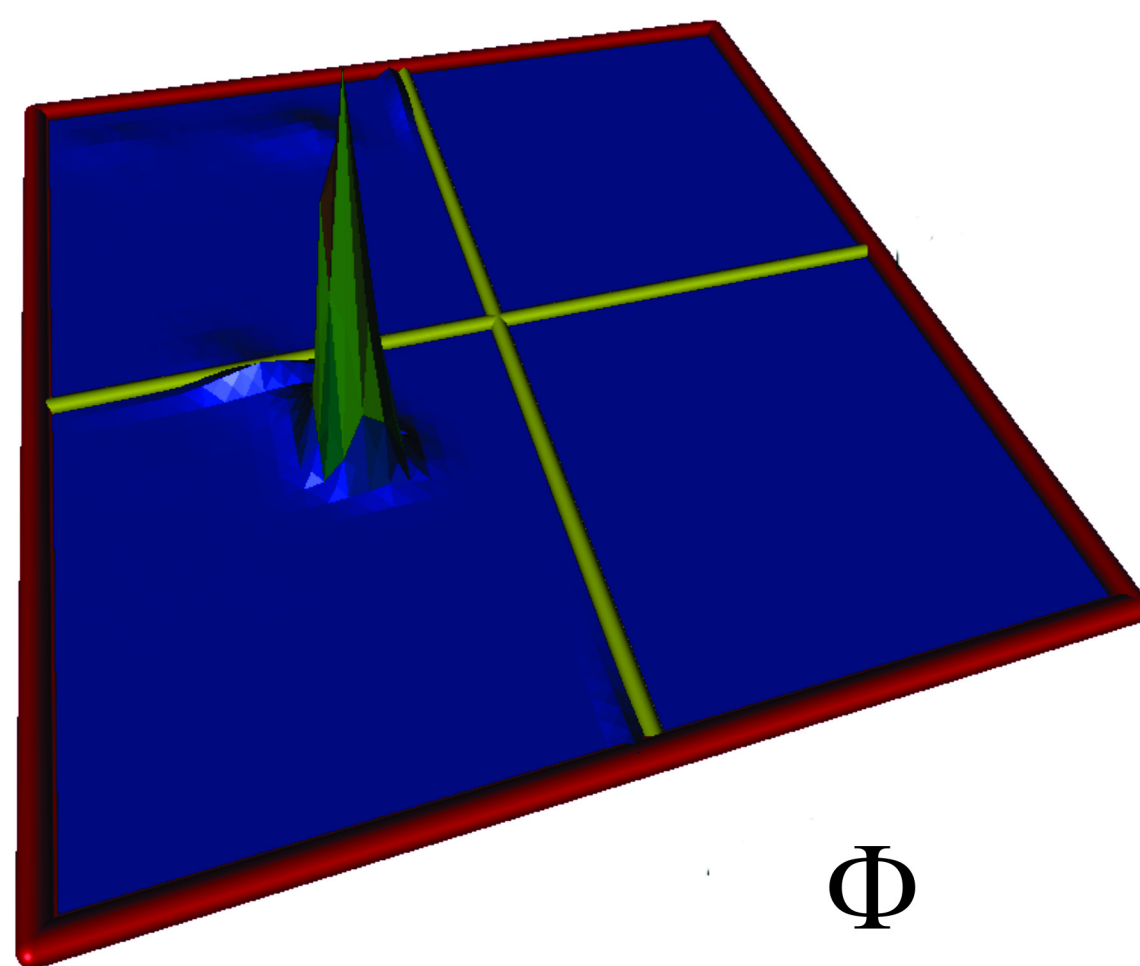

TM 4A HELIX

A

Ψ

Φ

Φ

B

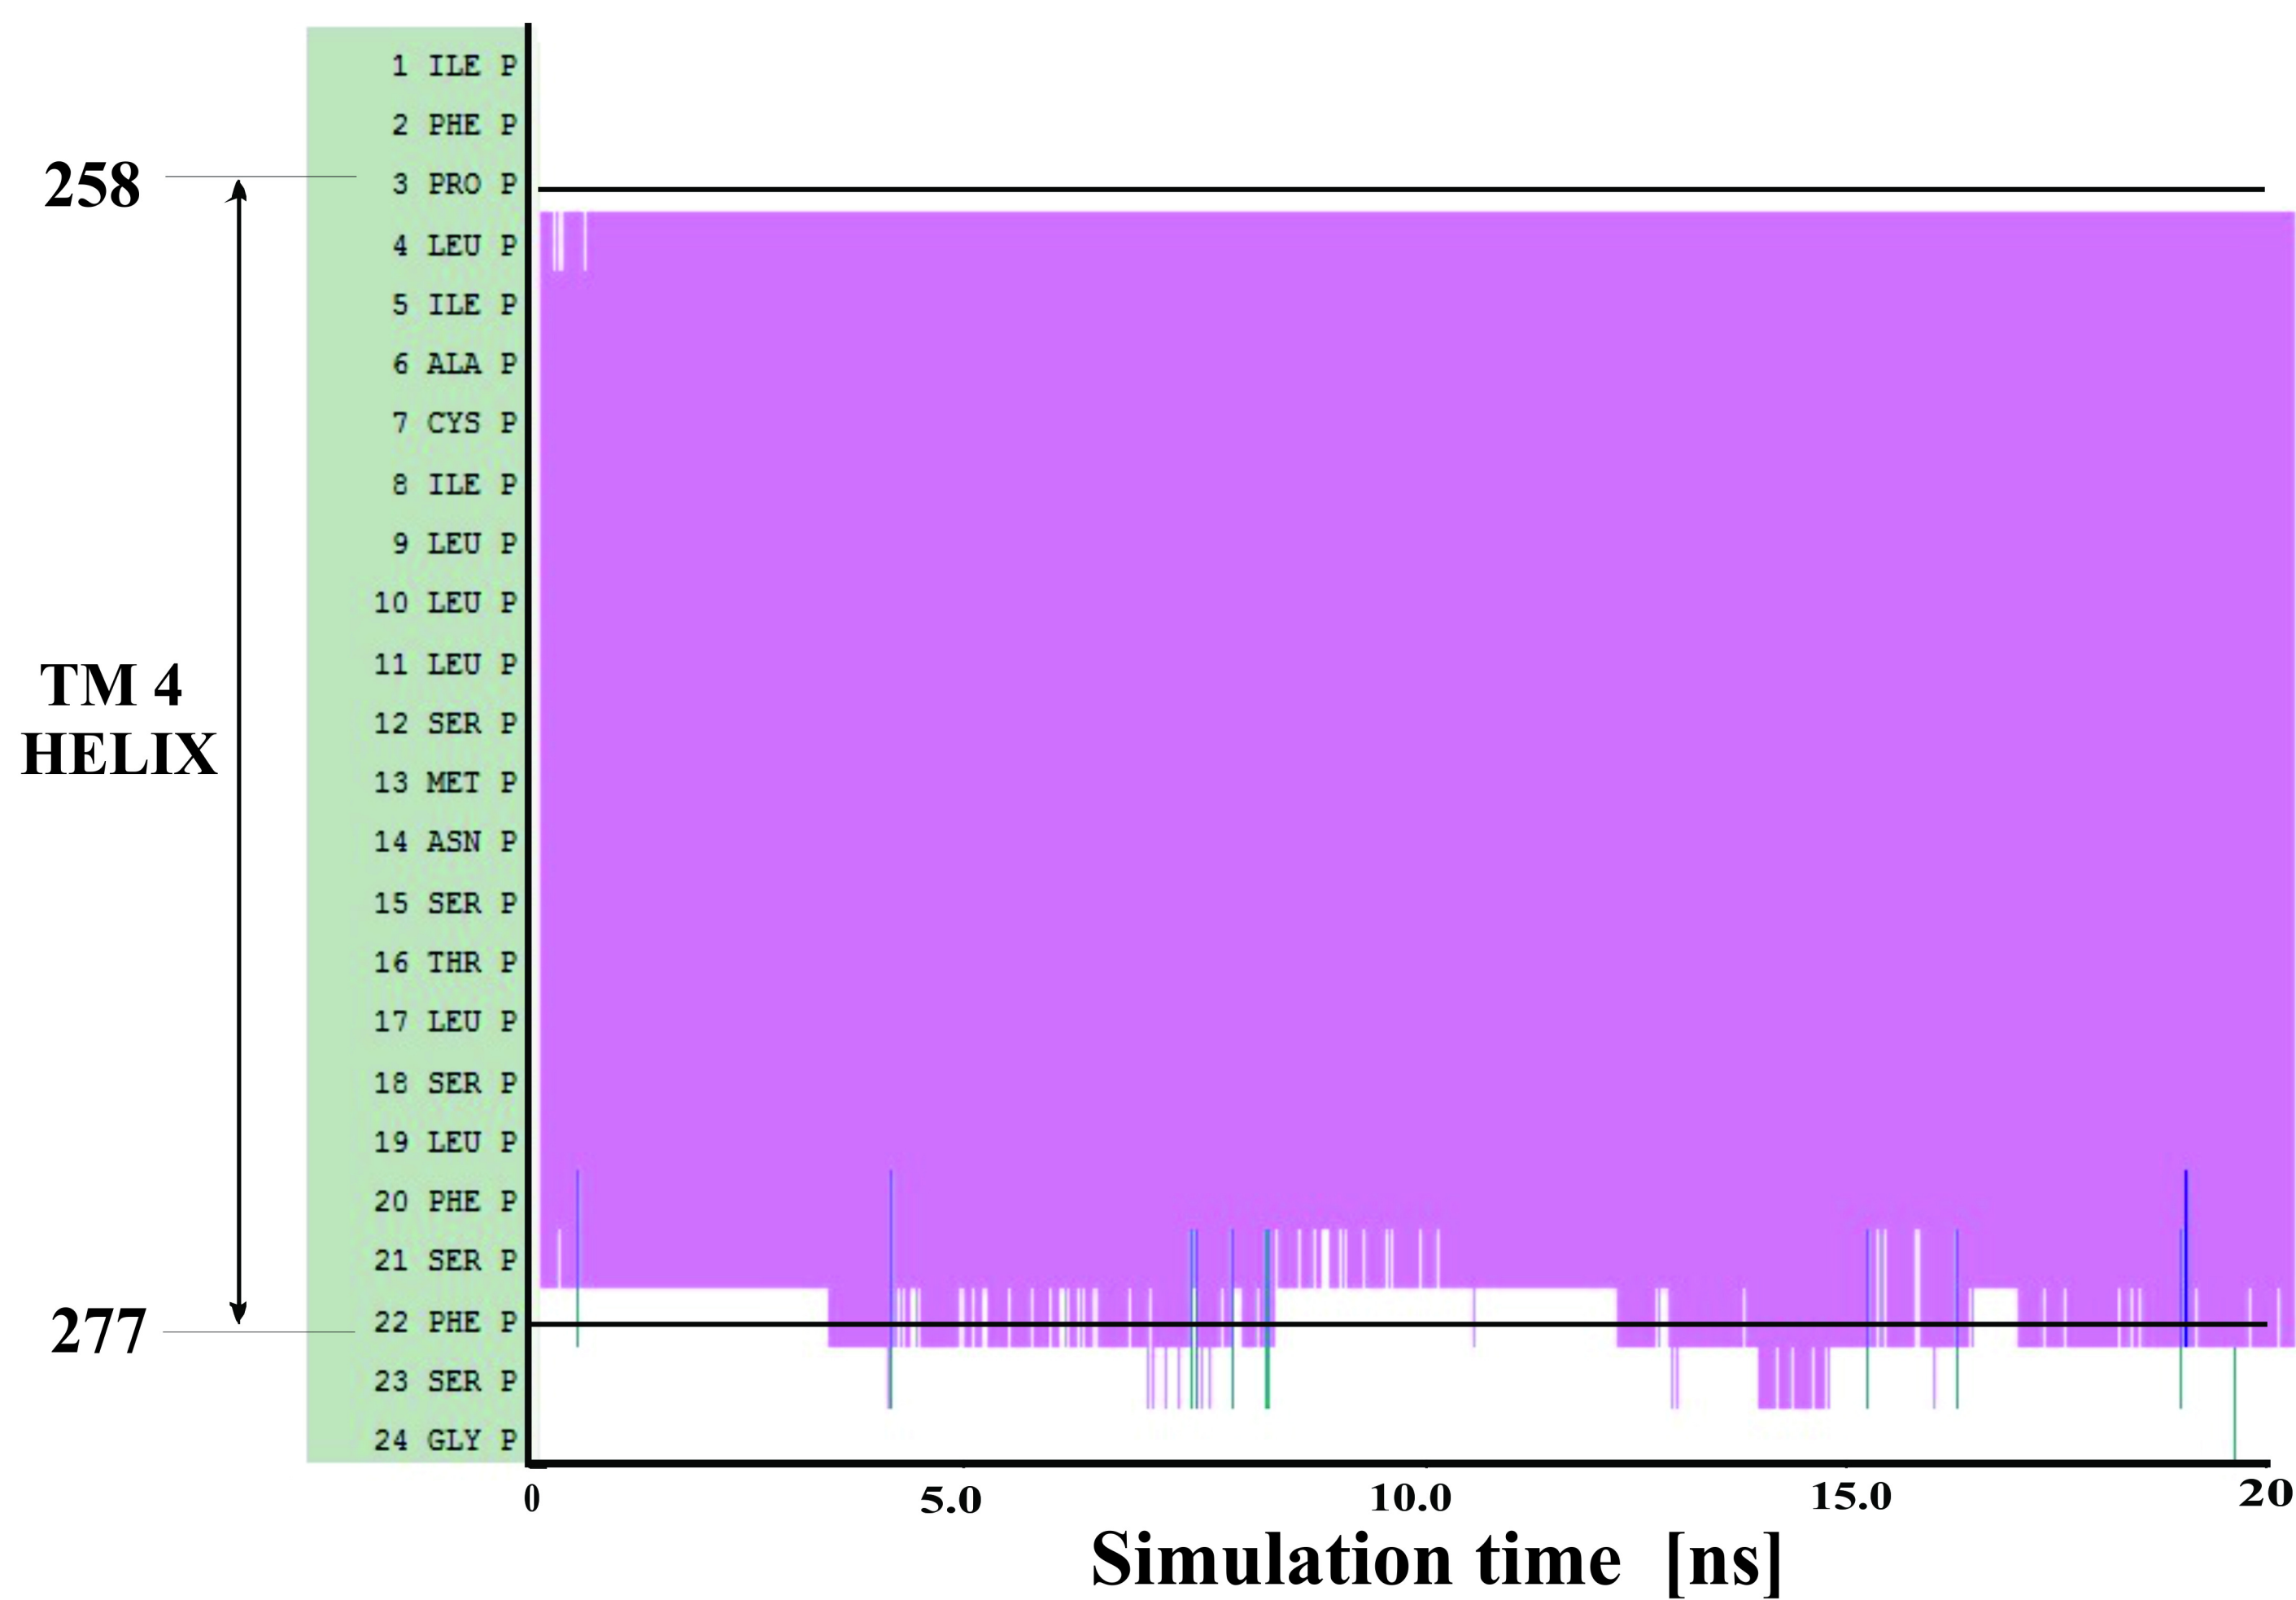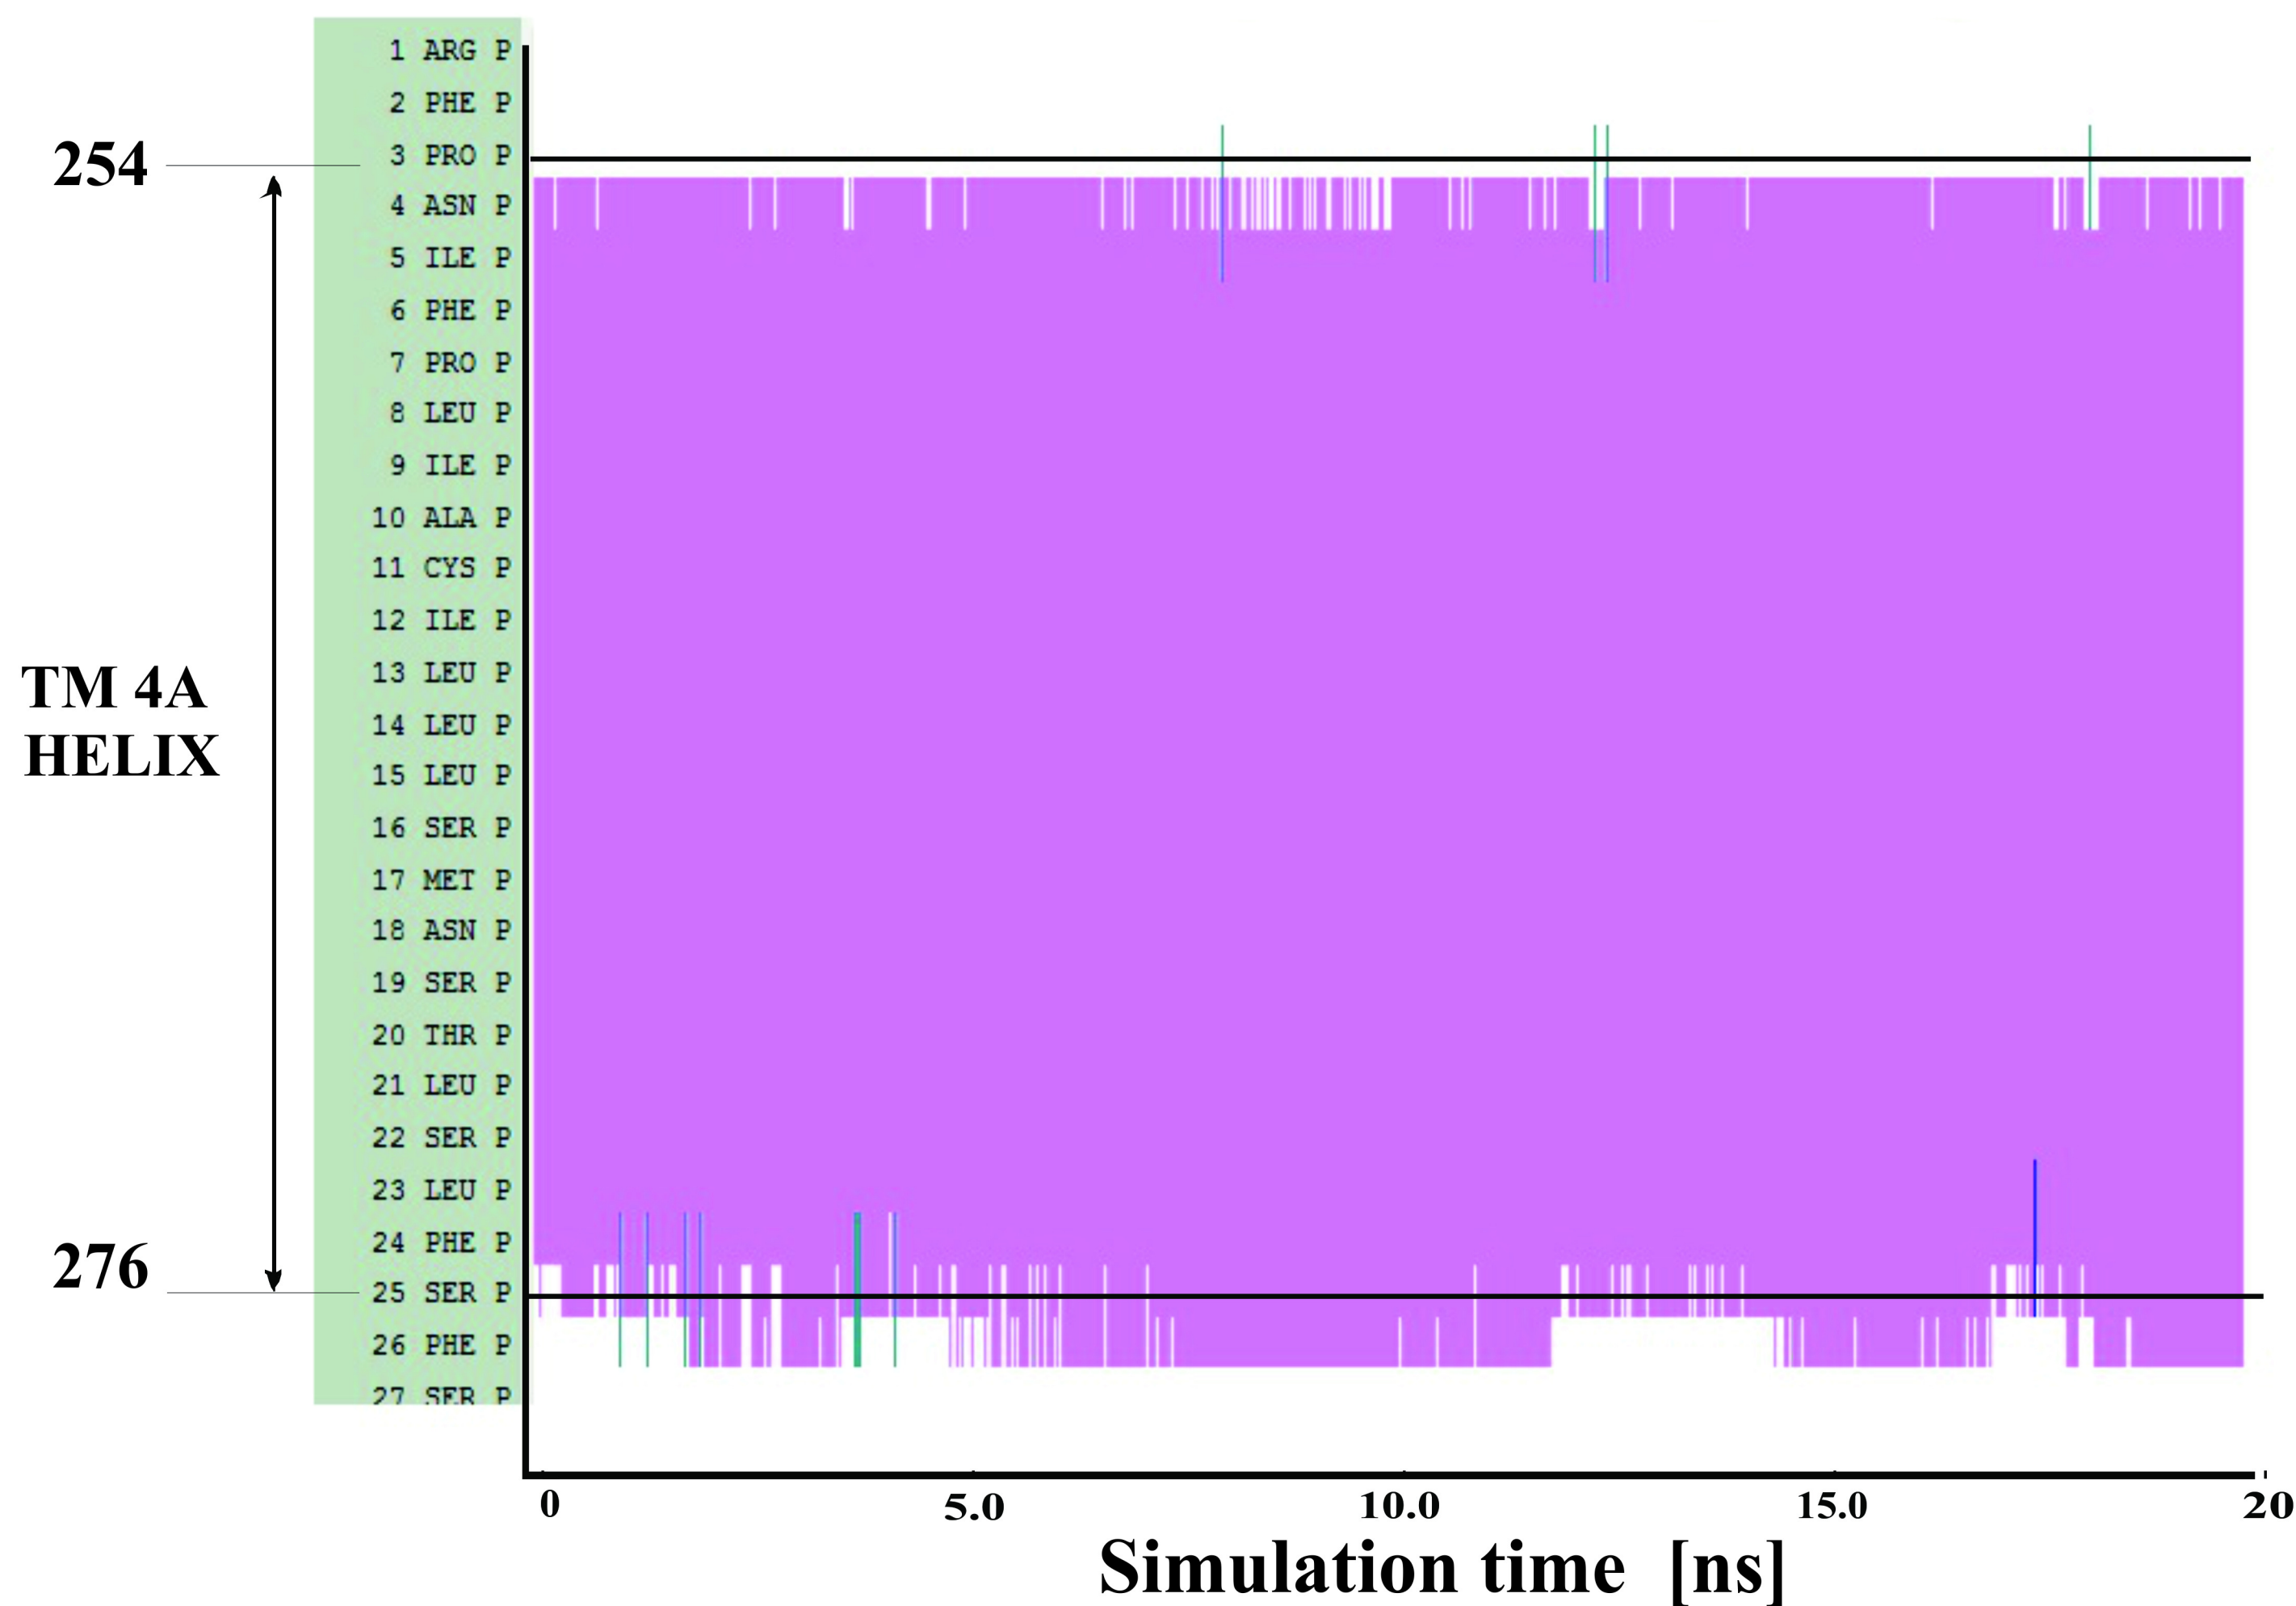

Supplement: s1 [file s1]

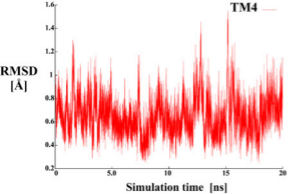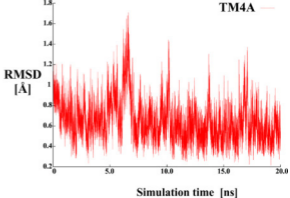

Supplement: s1 [file s1]

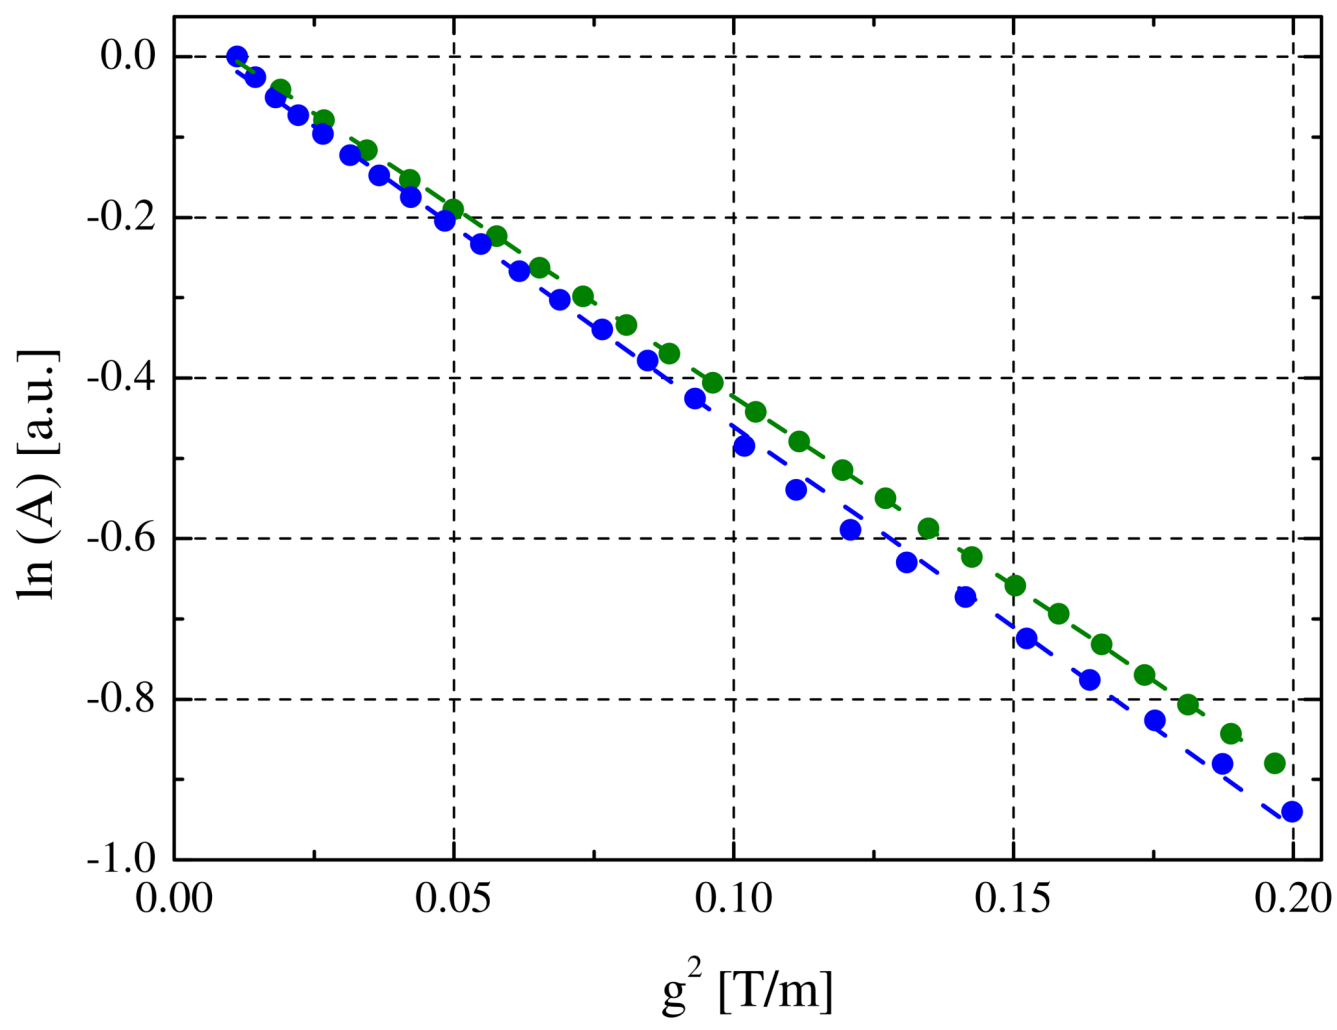

Supplement: s1 [file s1]

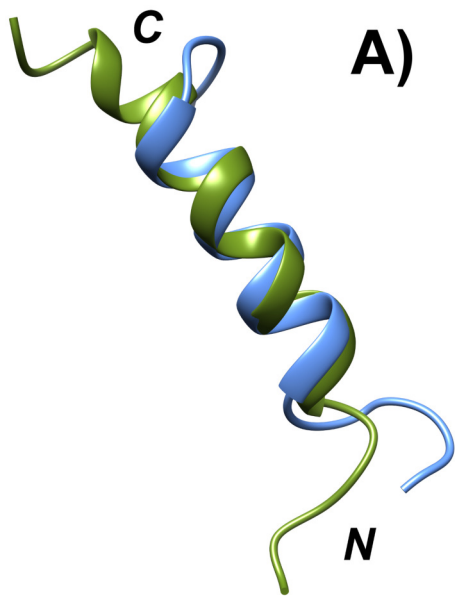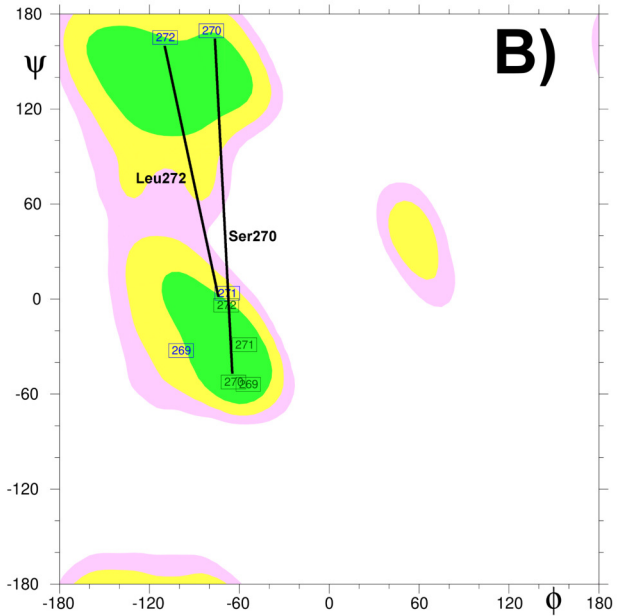

Supplement: s1 [file s1]

# TM4 in SDS

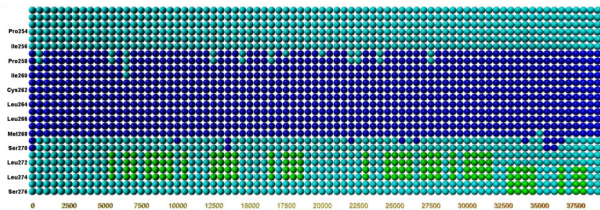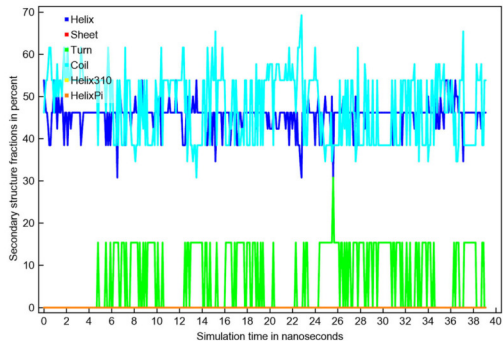

# TM4 in DPC

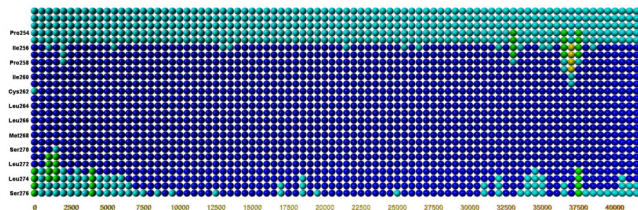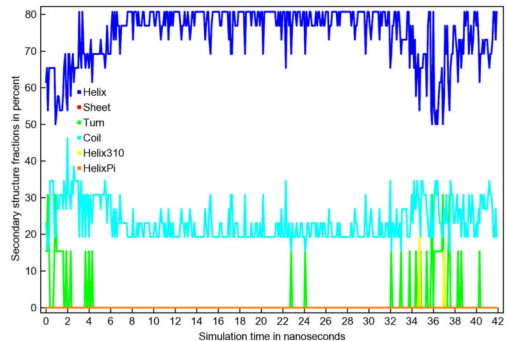

Supplement: s1 [file s1]

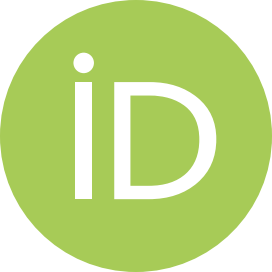

Supplement: s1 [file s1]

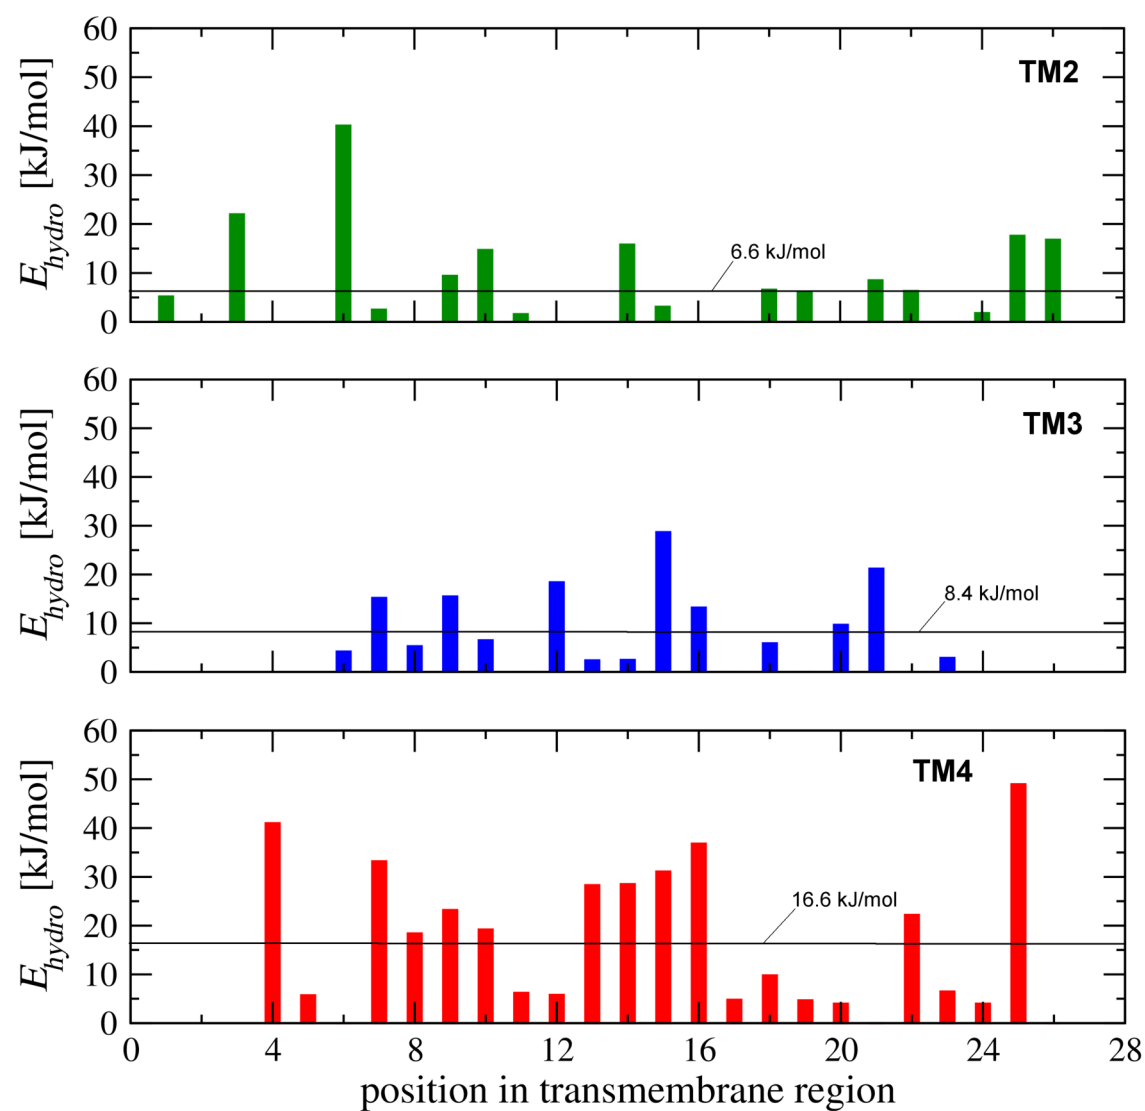

Supplement: s1 [file s1]

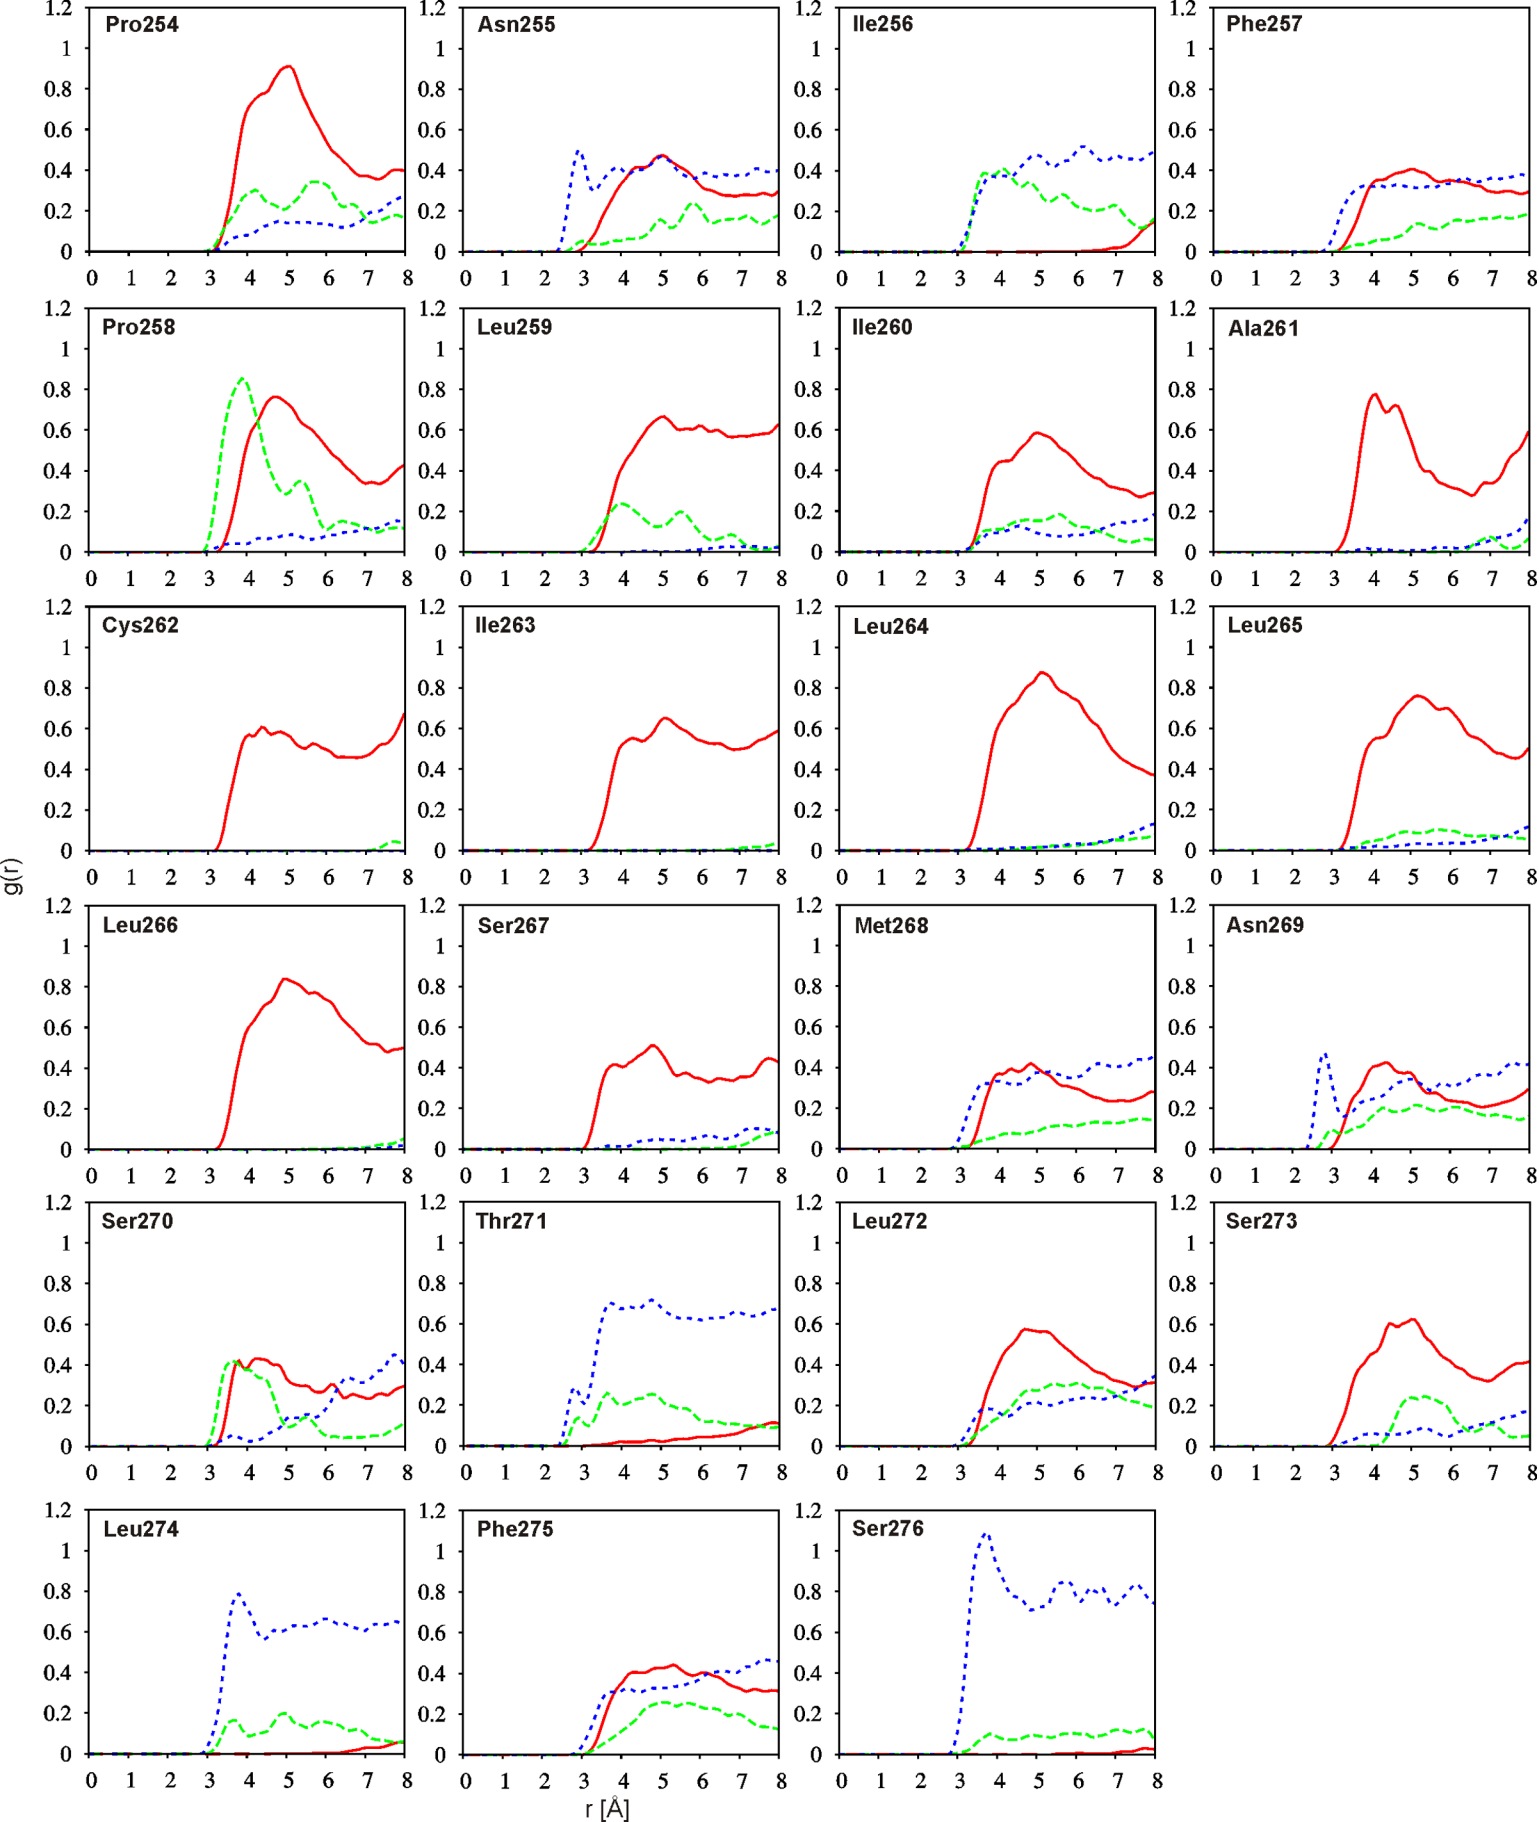

Supplement: s1 [file s1]

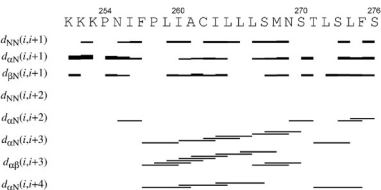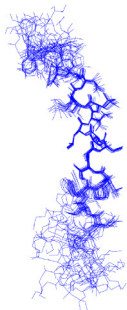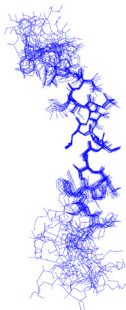

Supplement: s1 [file s1]

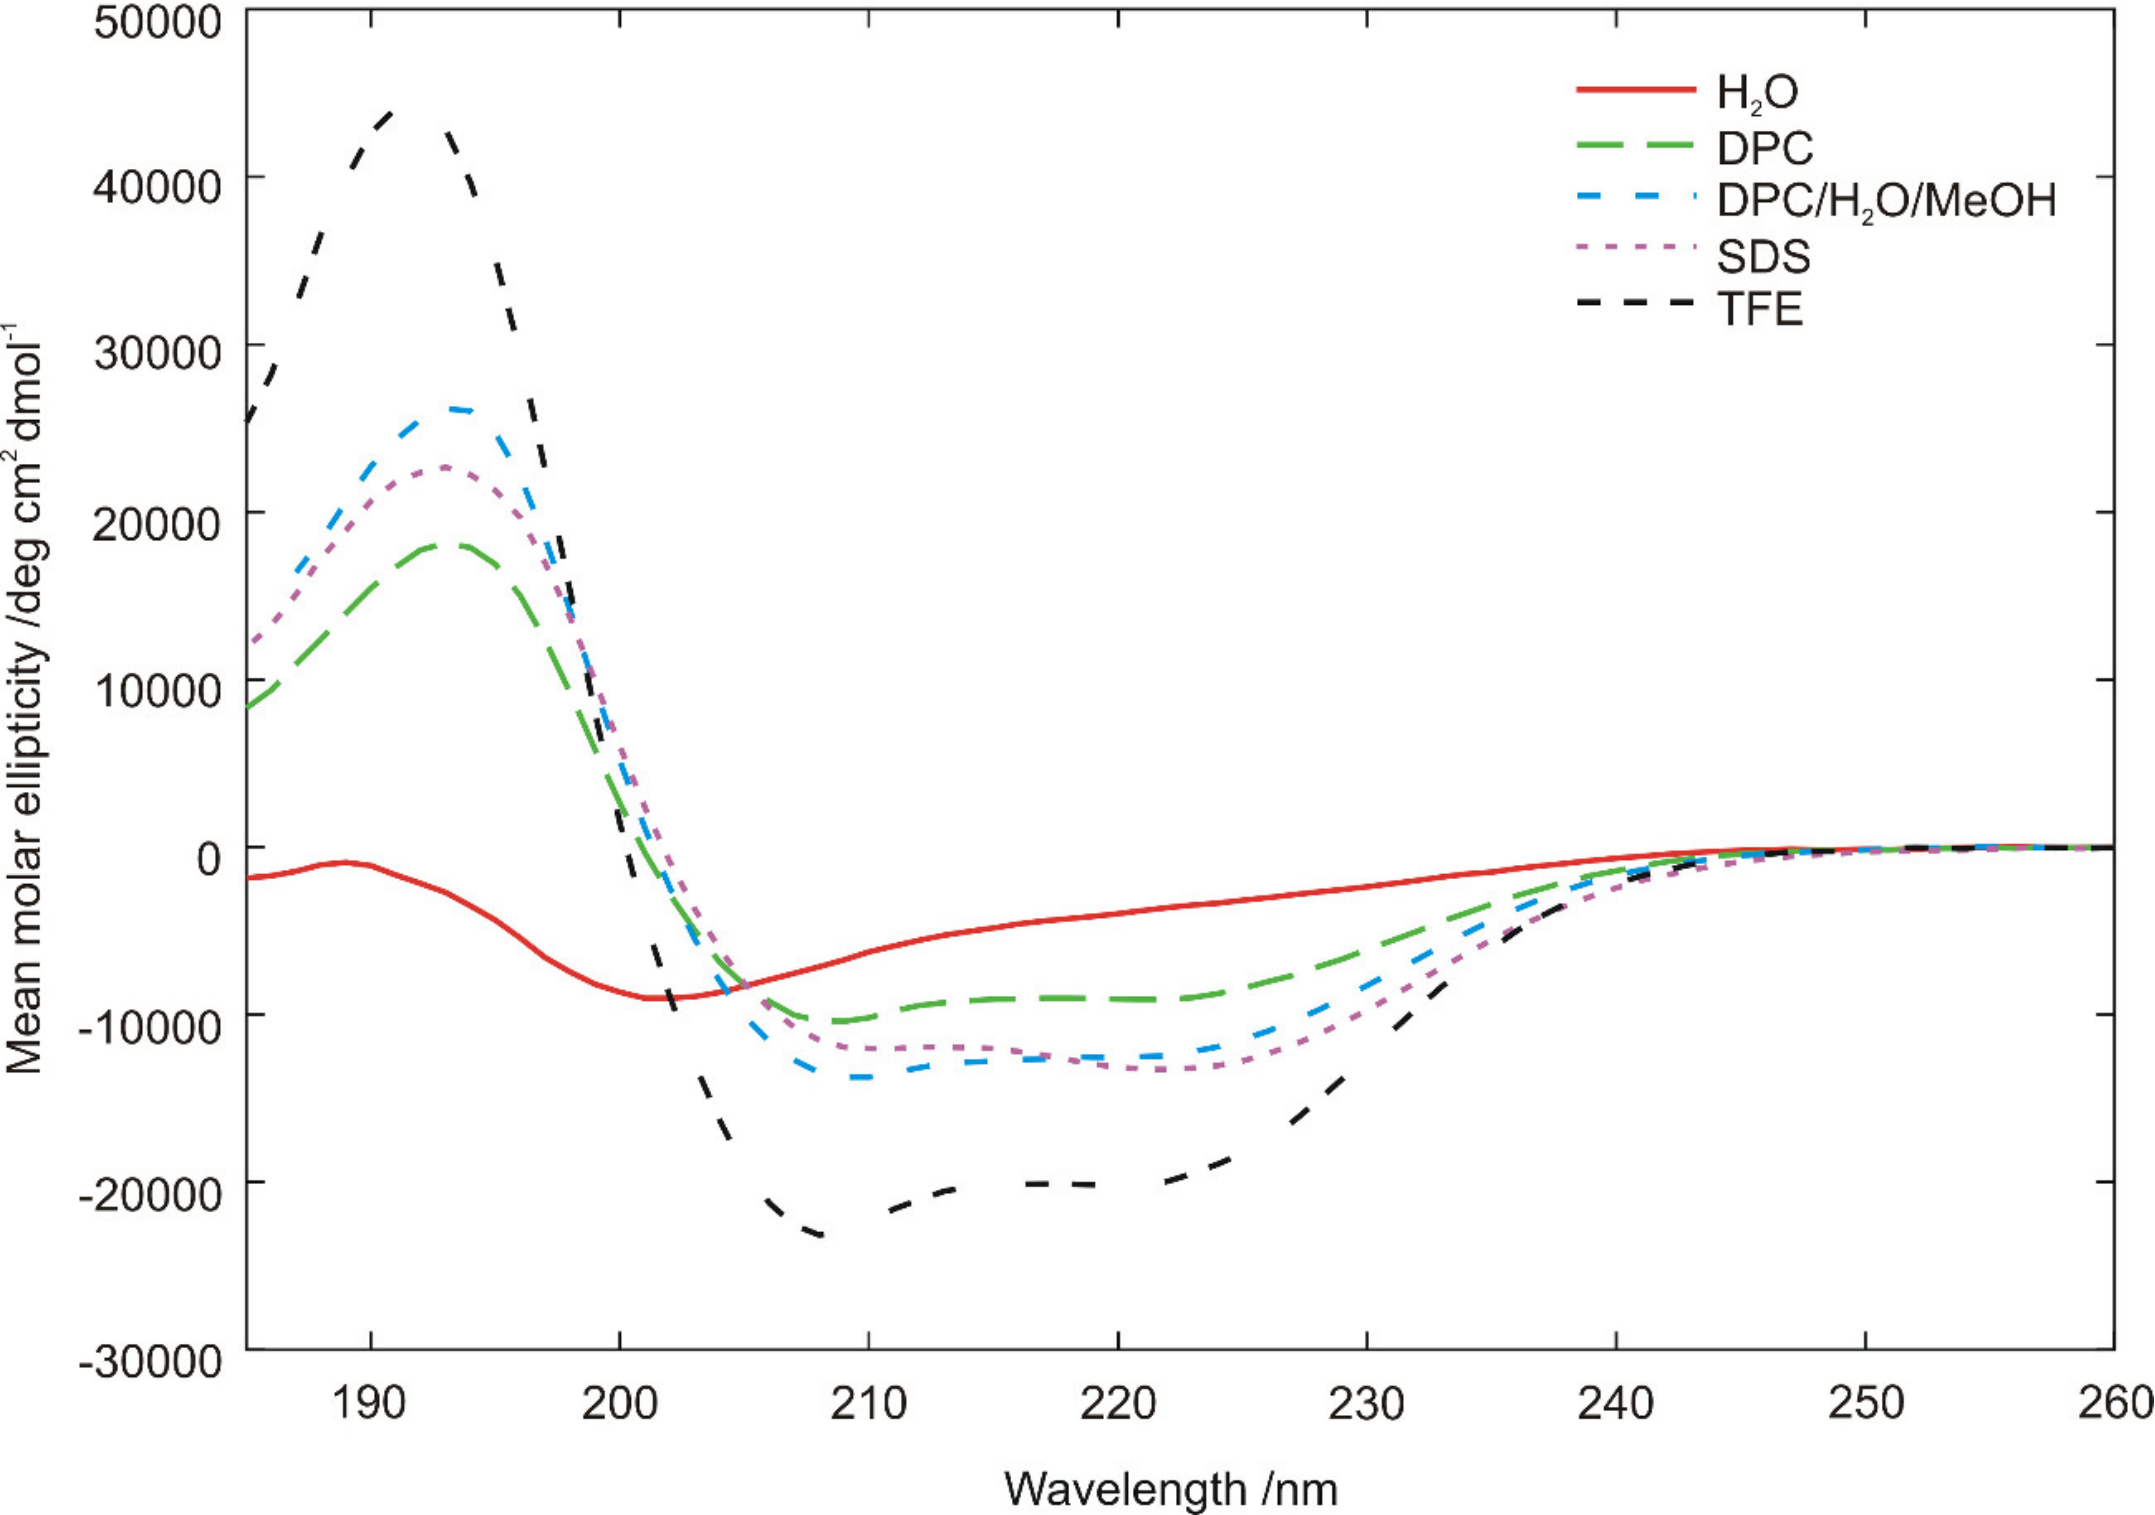

Supplement: s1 [file s1]

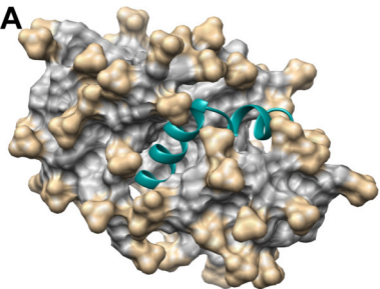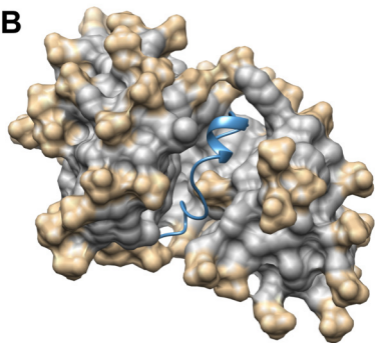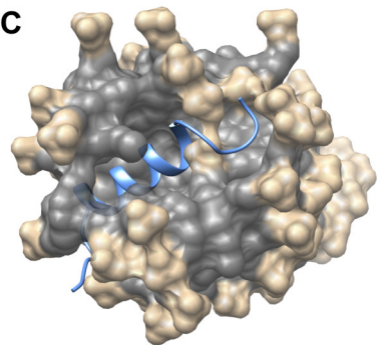

Supplement: s1 [file s1]

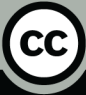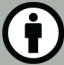

BY

Supplement: s1 [file s1]

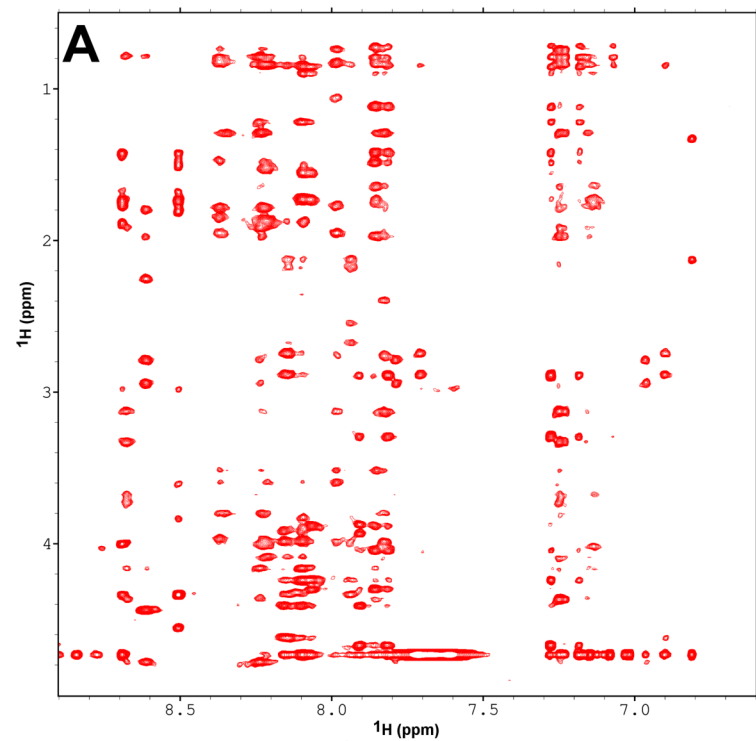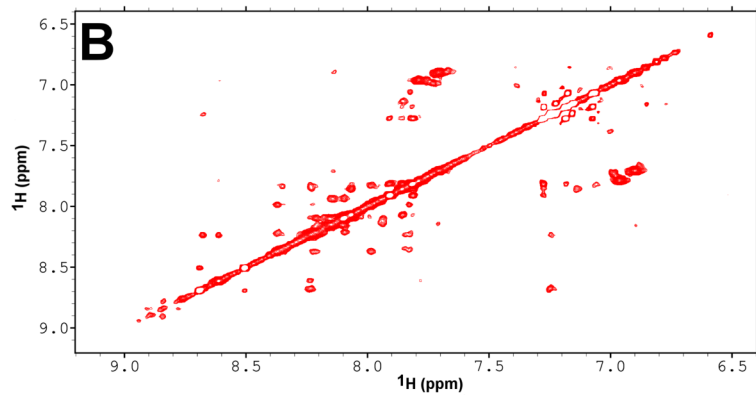

Supplement: s1 [file s1]

**A**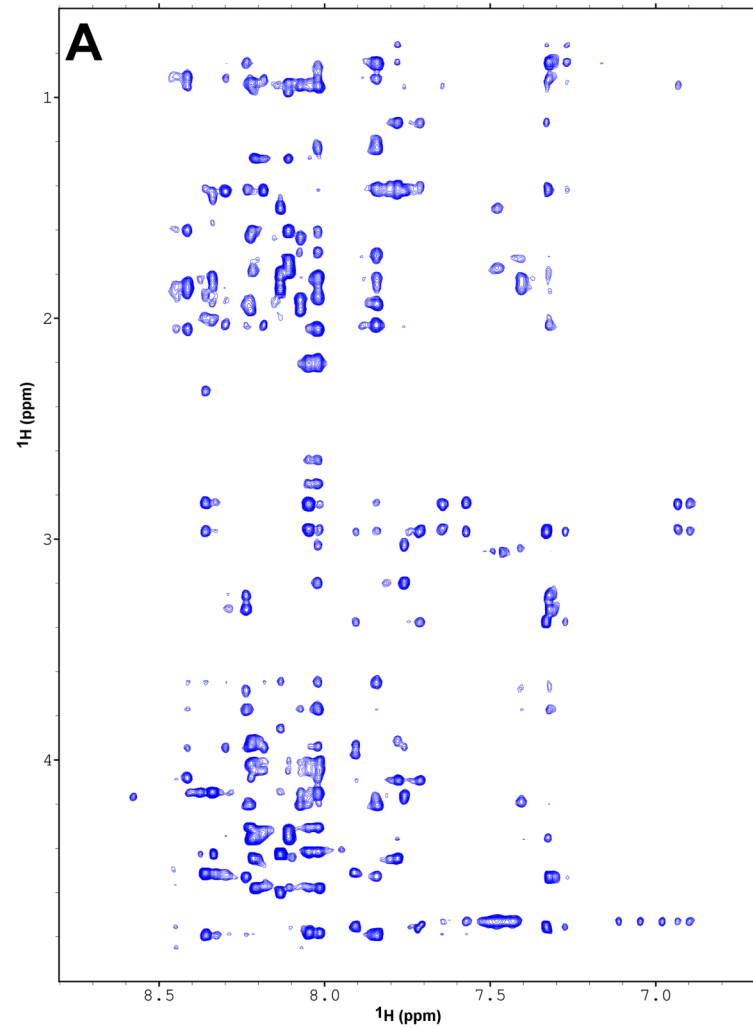**B**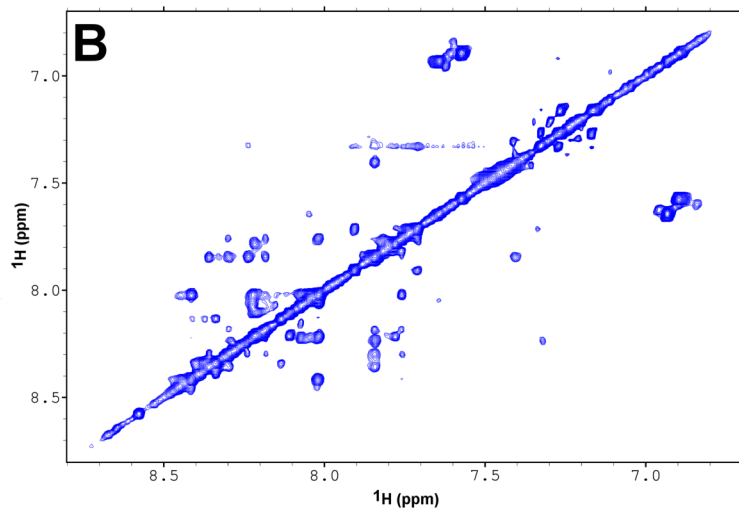

Supplement: s1 [file s1]

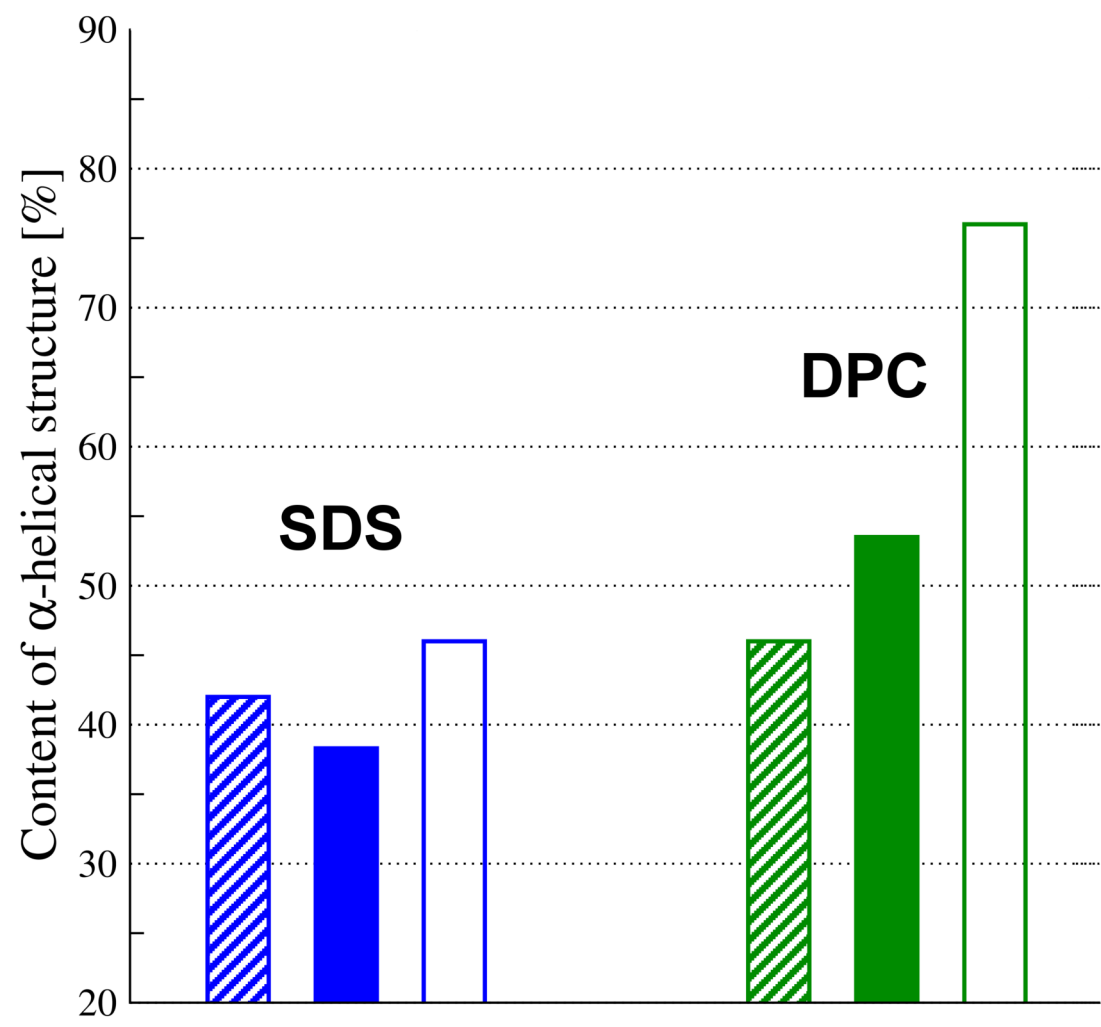

Supplement: s1 [file s1]

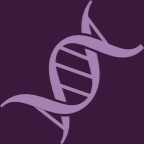

# International Journal of *Molecular Sciences*

Supplement: s1 [file s1]

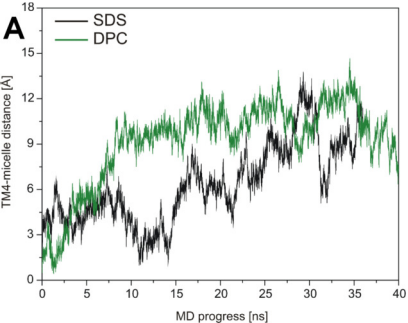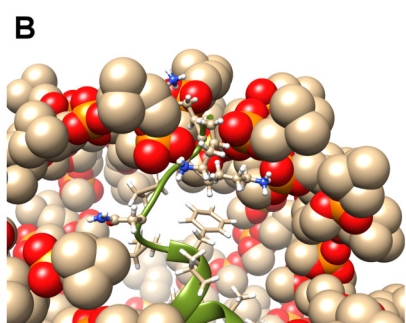

Supplement: s1 [file s1]

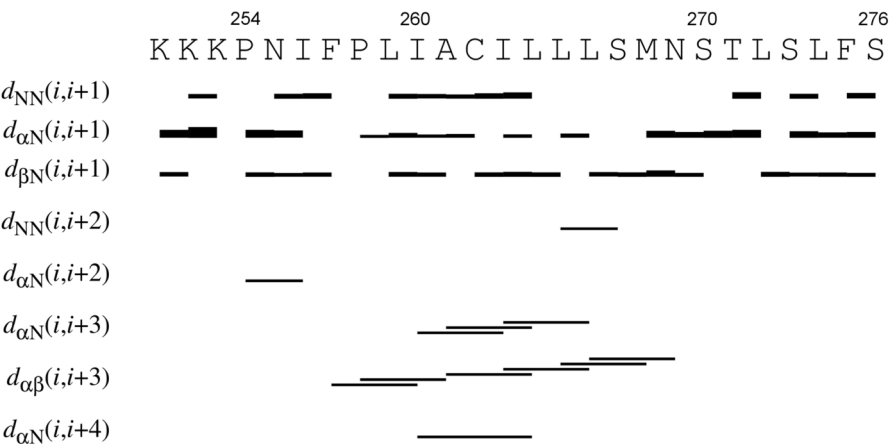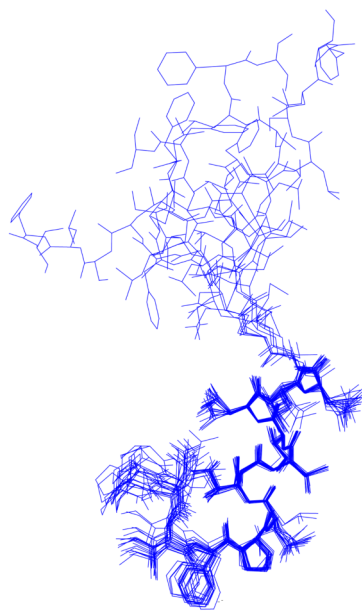

**Phe257**

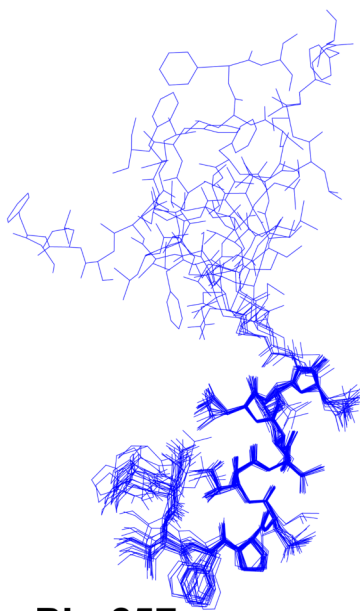

**Phe257**

Supplement: s1 [file s1]

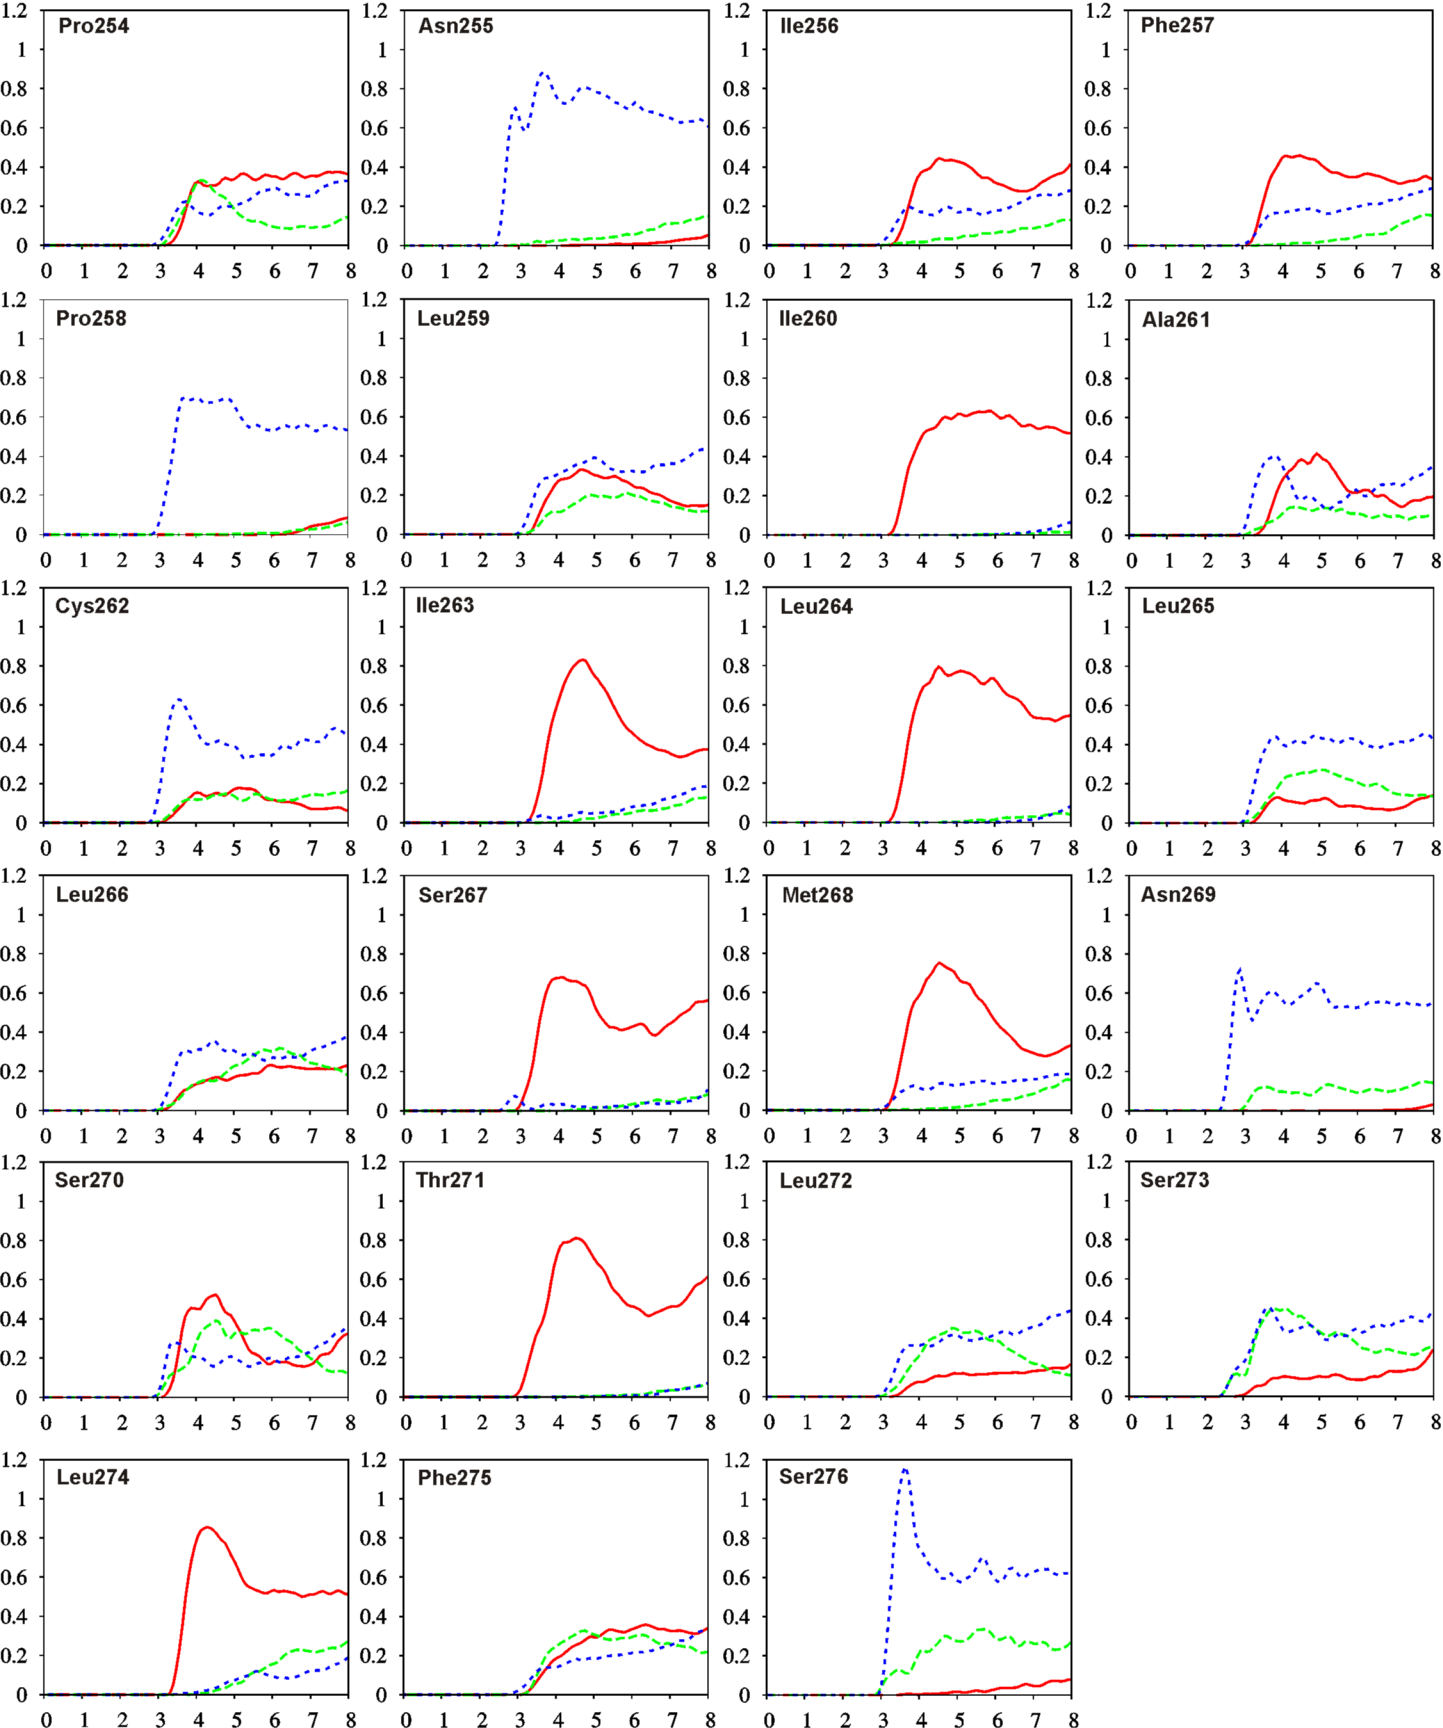

Supplement: s1 [file s1]
